# Supplementary material for: Efficacy of Phosphatidylinositol-3 Kinase Inhibitors in a Primary Mouse Model of Undifferentiated Pleomorphic Sarcoma
Source: PubMed Central journal article supplement (PMC3350993; doi:10.1155/2012/680708), 2012-04-29
Supplement: 680708.f1.pdf [file 680708.f1.pdf]

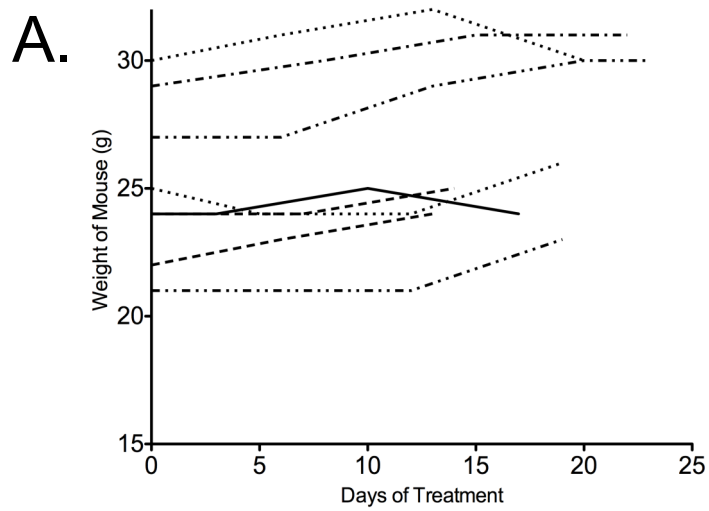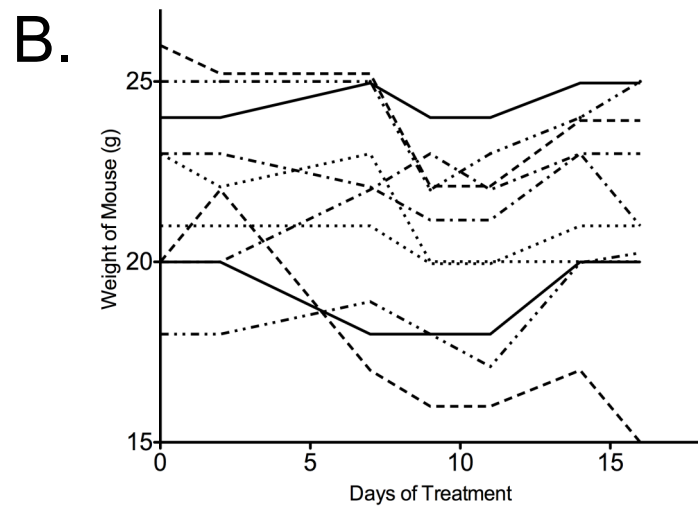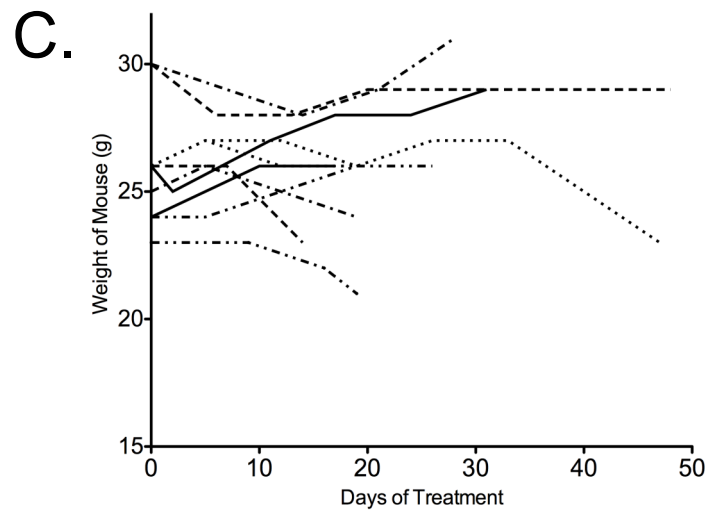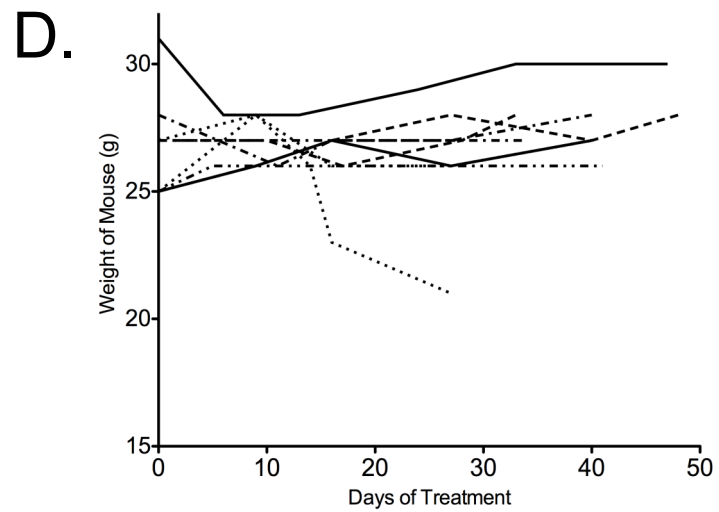

**Supplemental Figure 1.** Changes in body weight for mice treated with (A) doxorubicin alone, (B) BEZ235 + doxorubicin, (C) BKM120 alone, and (D) BKM120 + doxorubicin.
